# Supplementary material
Source: PubMed Central journal article supplement (PMC5860960)
Supplement: NIHMS929948-supplement-supplement_1.pdf [file NIHMS929948-supplement-supplement_1.pdf]

**2. Primary Diagnosis**

- Not a TIA or stroke (skip to 7)
- TIA (skip to 7)
- Stroke

**3. Stroke Type**

**A. Type:**

- Subarachnoid Hemorrhage
- Intraparenchymal Hemorrhage
- Other Hemorrhage
- Brain Infarction
- Other Stroke Type
- Unknown Stroke Type

**B. Procedure-related?**

- Yes
- No

If yes, please specify:

**4. Location** - record using 2 digit codes below:

**A. Primary Location:**

**B. Other Locations:**

**C. Are more than five sites indicated?**

- Yes
- No

Codes:

| <u>Left</u>                                                 | <u>Right</u> |
|-------------------------------------------------------------|--------------|
| 01 Cerebral Hemisphere                                      | 02           |
| 03 Frontal Lobe                                             | 04           |
| 05 Parietal                                                 | 06           |
| 07 Insular-operculum                                        | 08           |
| 09 Occipital lobe                                           | 10           |
| 11 Temporal lobe                                            | 12           |
| 13 Basal ganglion                                           | 14           |
| 15 Thalamus                                                 | 16           |
| 17 Internal capsule / corona radiata /<br>centrum semiovale | 18           |
| 19 Cerebellum                                               | 20           |
| 21 Fronto-parietal lobe                                     | 22           |
| 23 Parietal-occipital lobe                                  | 24           |
| 25 Temporo-parietal lobe                                    | 26           |
| 27 Temporo-occipital lobe                                   | 28           |
| 29 Fronto-temporo-parietal lobe                             | 30           |
| 31 Basal ganglia and capsule                                | 32           |
| 41 Retina                                                   | 42           |
|                                                             |              |
| 33 Midline (third ventricular callosum)                     |              |
| 34 Intracranial (not further specified)                     |              |
| 35 Brain stem                                               |              |
| 36 Midbrain                                                 |              |
| 37 Pons                                                     |              |
| 38 Medulla                                                  |              |
| 39 Subarachnoid space                                       |              |
| 40 Intraventricular space                                   |              |
| 99 Unknown                                                  |              |

**5. Vascular Territory - record using 2 digit codes below:**

A. Primary Vascular Territory:

B. Other Vascular Territories:

## C. Are more than five vascular territories indicated?

Yes    No

Codes:

| <u>Left</u>                               | <u>Right</u> |
|-------------------------------------------|--------------|
| 20 Common Carotid                         | 50           |
| 21 External Carotid                       | 51           |
| 22 Internal Carotid                       | 52           |
| 23 ...At bifurcation                      | 53           |
| 24 ...Distal extracranial                 | 54           |
| 25 ...Intracranial                        | 55           |
| 26 ...Junction of posterior communicating | 56           |
| 27 ...Other                               | 57           |
| 28 Anterior cerebral                      | 58           |
| 29 ...Junction of anterior communicating  | 59           |
| 30 ...Other                               | 60           |
| 31 Middle cerebral                        | 61           |
| 32 ...Penetrating or lenticulostriate     | 62           |
| 33 ...Stem                                | 63           |
| 34 ...Upper branch                        | 64           |
| 35 ...Lower branch                        | 65           |
| 36 Posterior communicating                | 66           |
| 37 Posterior cerebral                     | 67           |
| 38 ...Penetrating                         | 68           |
| 39 ...Stem                                | 69           |
| 40 ...Calcarine branch                    | 70           |
| 41 Superior cerebellar                    | 71           |
| 42 Posterior inferior cerebellar          | 72           |
| 43 Vertebral                              | 73           |
| 44 Subclavian                             | 74           |
| 45 Anterior choroidal                     | 75           |
| 46 Ophthalmic                             | 76           |
| 80 Anterior communicating                 |              |
| 81 Basilar                                |              |
| 82 ...Penetrating                         |              |
| 83 ...Full                                |              |
| 84 ...Upper branch                        |              |
| 85 ...Lower branch                        |              |
| 86 Innominate                             |              |
| 99 Unknown                                |              |

If Stroke Type is not Brain Infarction, skip to 7.

**6. Brain infarct subtypes:**

All three boxes need not be filled.

- First choice of Subtype (reflection of strict adherence to the algorithm)
- Second choice of Subtype (allows for some loosening of the criteria and is an attempt to reduce the number of cases classified as "Unknown")
- Third choice of Subtype (to be completed only if 'First choice of subtype' is '7: more than one etiology' – This box should contain the second of the two selected etiologies)

Choices:

- 1 - Large vessel extracranial atheroembolic
- 2 - Large vessel intracranial atheroembolic
- 3 - Cardioembolic
- 4 - Small vessel (lacunae)
- 5 - Acute ischemic stroke of other known etiology
- 6 - Ischemic stroke of unknown cause (no probable etiology despite complete workup)
- 7 - Ischemic stroke of unknown cause (more than one etiology)
- 8 - Ischemic stroke of unknown cause (workup is incomplete)

**Complete question 7 for all diagnoses.**

7. Did the patient die?

Yes  No

If the cause of death is stroke, the stroke reviewer(s) will fill out the Mortality Review Form. For all other causes of death, the cardiac reviewer(s) will fill out the Mortality Review Form. Is stroke the cause of death?

Yes  No  Cancel

Reviewing Physician's ID:

Date:

Data Entry ID:

Reviewer Comments:

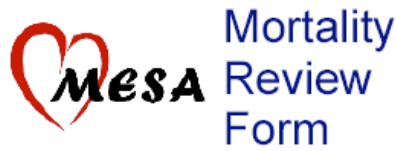

**Participant + Investigation ID:**

Type of Review:

- Local (Field Center review)
- Central (other committee member review)
- Final (consensus)
- Committee

**All Deaths**

1. Location of death:

- Out-of-Hospital
- Emergency Room (not DOA)
- In Hospital
- Nursing Home, SNF, or ECF
- Other, specify:

2. Was the death witnessed?

- Yes
- No

3. MESA classification of underlying cause of death (choose one)

- Atherosclerotic coronary heart disease (complete questions 4-7 only)
- Stroke (complete questions 8-9 only)
- Atherosclerotic disease other than coronary disease or stroke (specify):  
 (complete questions 6 & 7 only)
- Other cardiovascular disease, not defined above (specify):  
 (complete questions 6 & 7 only)
- Non-cardiovascular disease (specify):  
 (skip to end of form)

**Coronary Heart Disease (CHD) Deaths**

4. Type of fatal coronary heart disease:

- Definite fatal MI (no known non-atherosclerotic cause and definite MI within 4 weeks death)
- Definite fatal CHD (no known non-atherosclerotic cause, and one or both of the following: chest pain within 72 hours of death or a history of chronic ischemic heart disease)
- Possible fatal CHD (no known non-atherosclerotic cause, and and death certificate underlying cause: I20-25, I46, I51.6, R96 or R98-99)

5. Estimated time between onset of acute cardiac symptoms and death:

- Less than 5 minutes
- 5 minutes to 1 hour
- 1 hour to 24 hours
- More than 24 hours
- Unknown

(Continue to question 6.)

**Cardiovascular Death (including CHD)**

6. Mechanism of death in patients dying of cardiovascular causes (check all that apply):

- Primary arrhythmic death
- Secondary arrhythmic/mechanical death
- Congestive heart failure (CHF)
- Cardiac procedure such as CABG or angioplasty
- Hemorrhage from thrombolytic therapy
- Non-cardiovascular disease (specify):
- Unknown or Uncertain

7. Treatment or procedure-related:

- Yes, cardiovascular (specify):
- Yes, non-cardiovascular (specify):
- No

(Skip to End and submit.)

**Stroke Death**

8. Estimated time between onset of acute stroke symptoms and death:

- Less than 5 minutes
- 5 minutes to 1 hour
- 1 hour to 24 hours
- 1 day to 1 week
- 1 week to 1 month
- Longer than one month

9. Mechanism of stroke death (check all that apply):

- Critical Brain injury
- Infection
- Pulmonary Embolus
- Other:

- Unknown

Reviewer ID:  Date:  Data Entry ID:

Reviewer Comments:

**Reset** Click on Reset if you would like to cancel and restart.

**Submit** Click Submit to enter this review.

**Investigations** Click here to return to list of Investigations Needing Review without submitting review

**Send Comment** Click here to send comments.

If this review cannot be completed due to missing information, pre-baseline conditions, or other issues, please enter your comments in the Reviewer Comments field and press the 'Send Comments' button. Your comments will be forwarded to the CC Events Coordinator.
